# Supplementary material for: Validation and psychometric analysis of the Internet Addiction Test in Spanish among college students
Source: Springer Nature journal article supplement (doi:10.1186/s12889-015-2281-5), 2015-09-24
Supplement: MOESM2 [file 9750400]

## Additional file 2. Spanish Version of IAT.

| Item | Pregunta                                                                                                                                      |
|------|-----------------------------------------------------------------------------------------------------------------------------------------------|
| 1    | ¿Con qué frecuencia te da la impresión de que pasas más tiempo en internet del que pensabas?                                                  |
| 2    | ¿Con qué frecuencia dejas las labores del hogar por estar conectado a internet?                                                               |
| 3    | ¿Con qué frecuencia prefieres la emoción que te proporciona internet a intimar con tu pareja?                                                 |
| 4    | ¿Con qué frecuencia entabla nuevas amistades con otros usuarios de internet?                                                                  |
| 5    | ¿Con qué frecuencia protesta la gente de tu entorno por el tiempo que pasas en internet?                                                      |
| 6    | ¿Con qué frecuencia se ve perjudicado tu rendimiento académico por el tiempo pasado en internet?                                              |
| 7    | ¿Con qué frecuencia miras tu correo antes de hacer otra cosa que tienes que hacer?                                                            |
| 8    | ¿Con qué frecuencia se ve perjudicado tu rendimiento o productividad en el trabajo por culpa de internet?                                     |
| 9    | ¿Con qué frecuencia te vuelves reservado o te pones a la defensiva cuando alguien te pregunta lo que haces en internet?                       |
| 10   | ¿Con qué frecuencia enmascaras tus problemas de la vida real con pensamientos relajantes sobre internet?                                      |
| 11   | ¿Con qué frecuencia te ves pensando en el momento en que vas a meterte en internet?                                                           |
| 12   | ¿Con qué frecuencia temes que tu vida sin internet sería aburrida, vacía y carente de felicidad?                                              |
| 13   | ¿Con qué frecuencia saltas, voceas o te enfadas cuando alguien te molesta mientras estás en internet?                                         |
| 14   | ¿Con qué frecuencia pierdes horas de sueño porque te quedas hasta altas horas en internet?                                                    |
| 15   | ¿Con qué frecuencia te obsesionas con internet cuando no estás conectado?                                                                     |
| 16   | ¿Con qué frecuencia piensas “solo unos minutos más” cuando estás conectado?                                                                   |
| 17   | ¿Con qué frecuencia intentas reducir el tiempo que pasas conectado sin conseguirlo?                                                           |
| 18   | ¿Con qué frecuencia intentas ocultar el tiempo que pasas conectado?                                                                           |
| 19   | ¿Con qué frecuencia decides seguir en internet en lugar de salir con gente?                                                                   |
| 20   | ¿Con qué frecuencia te sientes deprimido, de mal humor o nervioso cuando no estás conectado y se te pasa todo en cuanto vuelves a conectarte? |

Escala: 0 = Nunca; 1 = Casi nunca; 2 = Ocasionalmente; 3 = Frecuentemente; 4 = A menudo; 5 = Siempre.
